# Supplementary material for: Characterization of the Annonaceous acetogenin, annonacinone, a natural product inhibitor of plasminogen activator inhibitor-1
Source: PubMed Central journal article supplement (PMC5120274; doi:10.1038/srep36462), 2016-11-23
Supplement: srep36462-s1.pdf [file srep36462-s1.pdf]

## Characterization of the Annonaceous acetogenin, annonacinone, a natural product inhibitor of plasminogen activator inhibitor-1

Stéphane Pautus<sup>1,2</sup>, Mouad Alami<sup>3</sup>, Frédéric Adam<sup>1</sup>, Guillaume Bernadat<sup>3</sup>, Daniel A Lawrence<sup>4</sup>, Allan De Carvalho<sup>1</sup>, Gilles Ferry<sup>2</sup>, Alain Rupin<sup>2</sup>, Abdallah Hamze<sup>3</sup>, Pierre Champy<sup>5</sup>, Natacha Bonneau<sup>5</sup>, Philippe Gloanec<sup>2</sup>, Jean-Louis Peglion<sup>2</sup>, Jean-Daniel Brion<sup>3</sup>, Elsa P. Bianchini<sup>1,7,\*</sup>, Delphine Borgel<sup>1,6,7</sup>

### Supplementary information

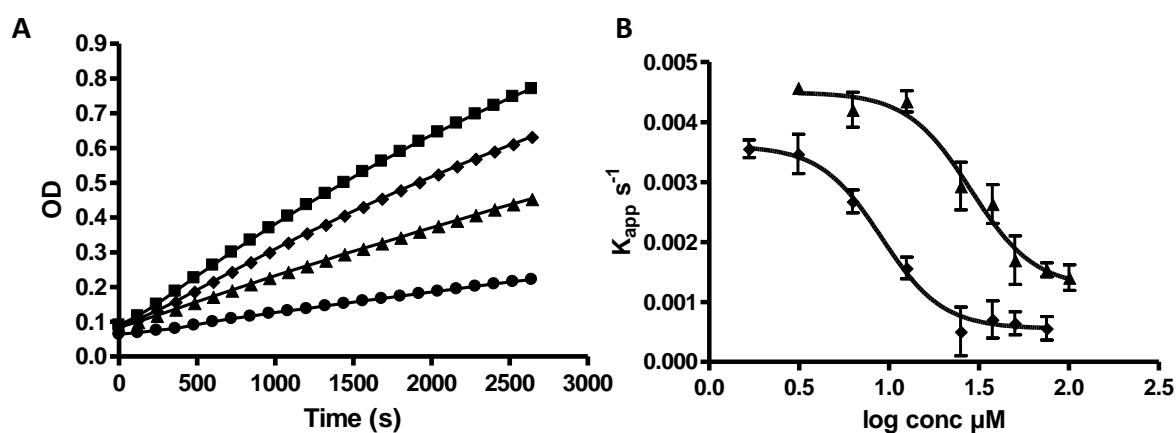

**Supplementary Figure S1:** (A) Effect of annonacinone and tiplaxtinin at 50  $\mu M$  in the chromogenic screening assay. Hydrolysis of the chromogenic substrate by tPA (closed square). Addition of PAI-1 (closed dot) inhibits tPA substrate hydrolysis. Further addition of tiplaxtinin at 50  $\mu M$  (closed triangle) and annonacinone at 50  $\mu M$  (closed diamond) reduce the rate of tPA inhibition by PAI-1. Progress curves were fitted using the pseudo first order equation to determine the apparent rate constant  $k$ . (B)  $IC_{50}$  of annonacinone (closed diamond) and tiplaxtinin (closed triangle) in the chromogenic assay. The apparent rate constants were plotted against drug concentrations and fitted using Graphpad prism software (Graphpad software, La Jolla USA) to determine the  $IC_{50}$

|                                          | R<br>(min) | K<br>(min) | Angle<br>(°) | MA<br>(mm) | LY30<br>(%) | LY60<br>(%) |
|------------------------------------------|------------|------------|--------------|------------|-------------|-------------|
| tPA                                      | 5.9        | -          | 69.8         | 15.7       | 94.3        | 96.8        |
| tPA + PAI-1                              | 6          | 2.3        | 72.7         | 23.1       | 0           | 0           |
| tPA + PAI-1 +<br>annonacinone 50 $\mu$ M | 6          | 1.6        | 73.5         | 21.4       | 87.1        | 93.6        |
| tPA + PAI-1 +<br>tiplaxtinin 50 $\mu$ M  | 7          | 1.8        | 66.2         | 24.5       | 21.9        | 50.2        |

**Supplementary Table S1:** Clotting parameters of plasma treated with tPA 9 nM; tPA 9 nM + PAI-1 22 nM and tPA 9 nM + PAI-1 22 nM with annonacinone and tiplaxtinin on thromboelastography. Each value is the representative of three independent experiments.

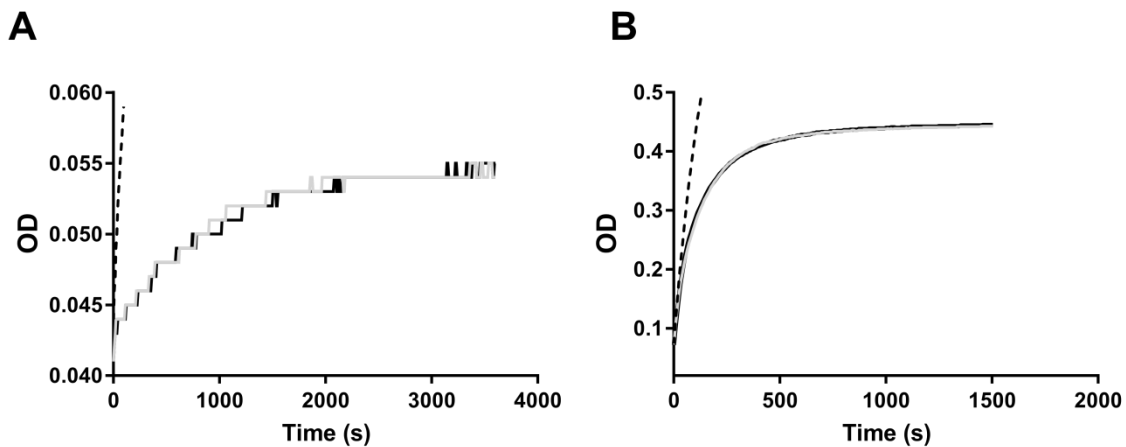

**Supplementary figure S2:** Effect of annonacinone on other serpins. A) Hydrolysis of specific chromogenic substrate by neutrophil elastase (dotted black line). Addition of 13 nM  $\alpha$ 1-antitrypsin (solid grey line) inhibits elastase substrate hydrolysis ( $k_{app} = 1.2 \times 10^{-3} \text{ s}^{-1}$ ). Preincubation of 50  $\mu$ M annonacinone with  $\alpha$ 1-antitrypsin for 20 min at 37°C (solid black line) resulted in a comparable inhibition rate of elastase by  $\alpha$ 1-antitrypsin ( $k_{app} = 1.1 \times 10^{-3} \text{ s}^{-1}$ ). B) Hydrolysis of specific chromogenic substrate by factor Xa (dotted black line). Addition of 51 nM fondaparinux-bound antithrombin (solid grey line) inhibits factor Xa substrate hydrolysis ( $k_{app} = 7.9 \times 10^{-3} \text{ s}^{-1}$ ). Preincubation of 50  $\mu$ M annonacinone with antithrombin for 20 min at 37°C (solid black line) resulted in a comparable inhibition rate of factor Xa by fondaparinux-bound antithrombin ( $k_{app} = 8.3 \times 10^{-3} \text{ s}^{-1}$ ).

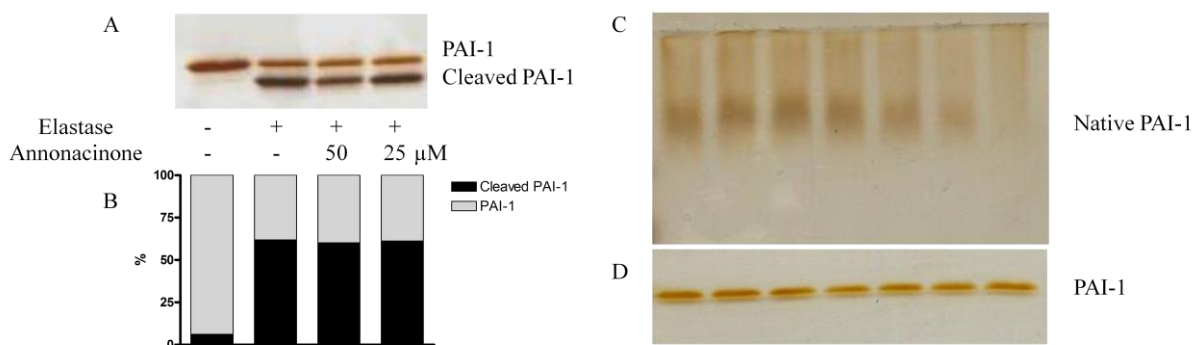

**Supplementary Figure S3:** A) Effect of annonacinone on elastase mediated cleavage of PAI-1 on SDS-PAGE. B) Band quantification using Scion Image Software (Scion Corporation, Frederick, MD, USA). C and D) Effect of annonacinone on PAI-1 polymerisation. PAI-1 (1  $\mu$ M) was mixed with 0, 1.7, 3.1, 6.3, 12.5, 25, or 50  $\mu$ M annonacinone (lane 1 to 7, respectively) and incubated for 30 min at 37  $^{\circ}$ C. The mixture was then mixed with native gel sample buffer and fractionated by native PAGE (C) or LDS sample buffer and fractionated on SDS-PAGE (D).

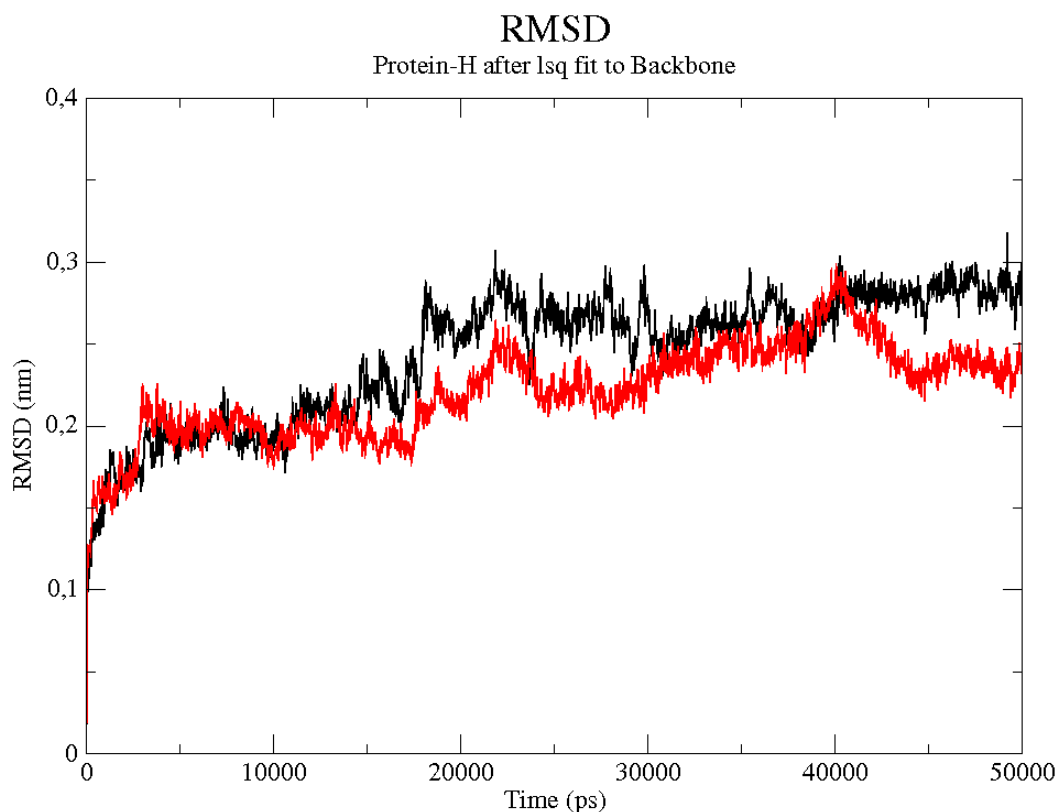

**Supplementary Figure S4:** Plots of PAI-1 RMSD as a function of time during molecular dynamics. (black: without annonacinone, red: with annonacinone.)

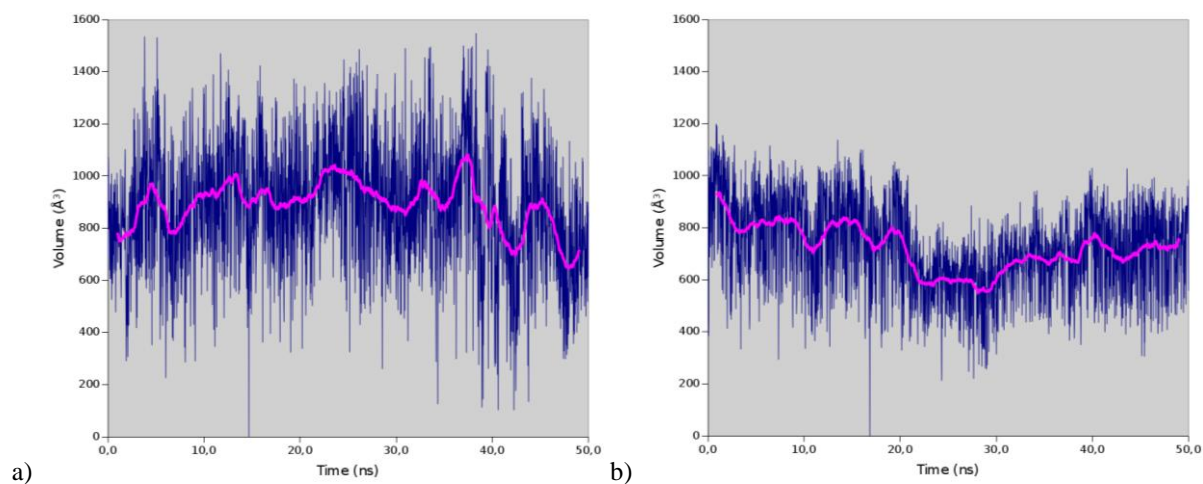

**Supplementary Figure S5:** Plots of annonacinone binding pocket volume as a function of time during molecular dynamics. (blue: actual value, pink: moving average, a) without annonacinone, b) with annonacinone.)

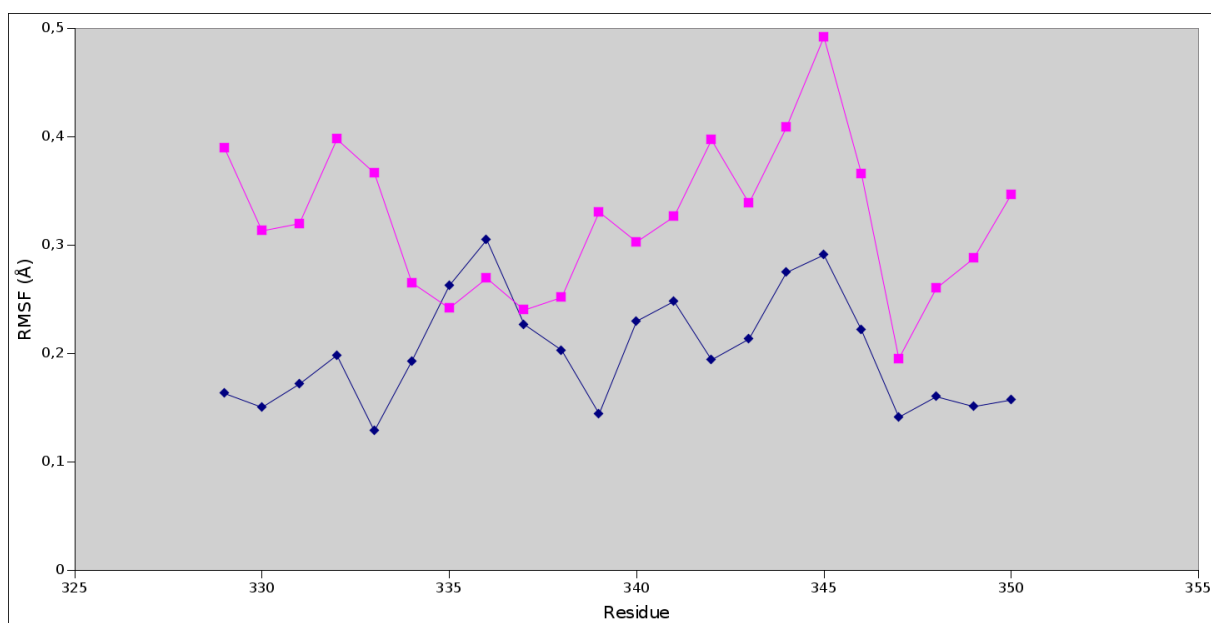

**Supplementary Figure S6:** Plots of RMS fluctuations of the reactive loop during molecular dynamics. (pink: without annonacinone, blue: with annonacinone.)
